# Supplementary material for: Structure Identification of ViceninII Extracted from Dendrobium officinale and the Reversal of TGF-β1-Induced Epithelial–Mesenchymal Transition in Lung Adenocarcinoma Cells through TGF-β/Smad and PI3K/Akt/mTOR Signaling Pathways
Source: Molecules. 2019 Jan 2;24(1):144. doi: 10.3390/molecules24010144 (PMC6337427; doi:10.3390/molecules24010144)
Supplement: Supplementary file 1 [file molecules-24-00144-s001.pdf]

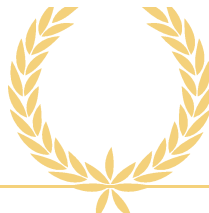

We certify that the following article

**Structure Identification of Vicenin II Extracted from *Dendrobium officinale* and Its Effect of Reversing TGF- $\beta$ 1-induced Epithelial-Mesenchymal Transition in Lung Adenocarcinoma Cells through TGF- $\beta$ /Smad and PI3K/Akt/mTOR Signaling Pathways**

Gang Wei

has undergone English language editing by MDPI. The text has been checked for correct use of grammar and common technical terms, and edited to a level suitable for reporting research in a scholarly journal.

MDPI uses experienced, native English speaking editors. Full details of the editing service can be found at

► [www.mdpi.com/authors/english](http://www.mdpi.com/authors/english).

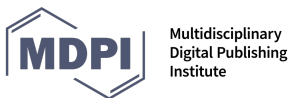

Basel, November 2018

Martyn Rittman, Ph.D.  
English Editing Manager  
[englishediting@mdpi.com](mailto:englishediting@mdpi.com)  
<http://www.mdpi.com/authors/english>
